# Supplementary material for: Calcitonin receptor expression in medullary thyroid carcinoma
Source: PeerJ. 2017 Sep 13;5:e3778. doi: 10.7717/peerj.3778 (PMC5600720; doi:10.7717/peerj.3778)
Supplement: Supplemental Information 4 [file peerj-05-3778-s004.xlsx]

## Sheet: Foglio1
Sample Name	1/Delta CT	CT mean	Delta CT
5552_95 NB Tumor	0.142003	34.0293	7.04211
5552_95 NB Normal tissue	0.117892	36.083	8.48235
1159_92 Tumor	0.235621	34.1054	4.2441
1159_92 Normal Tissue	0.206403	33.5627	4.84489
8518/02 Normal Tissue	0.0945466	10.5768	10.5768
8518/02 Tumor	0.239627	4.17316	4.17316
5125/02 Normal Tissue	0.138075	7.24244	7.24244
5125/02 Tumor	0.139178	7.18505	7.18505
TT	0.498658	28.6955	2.00538
MZCRC1	0.12807	33.4265	7.80823
